# Supplementary material
Source: publisher figshare collection journal article supplement (https://acs.figshare.com/ndownloader/files/4131811)
Supplement: Supplementary file 1 [file 4131811]

## Supporting Information File

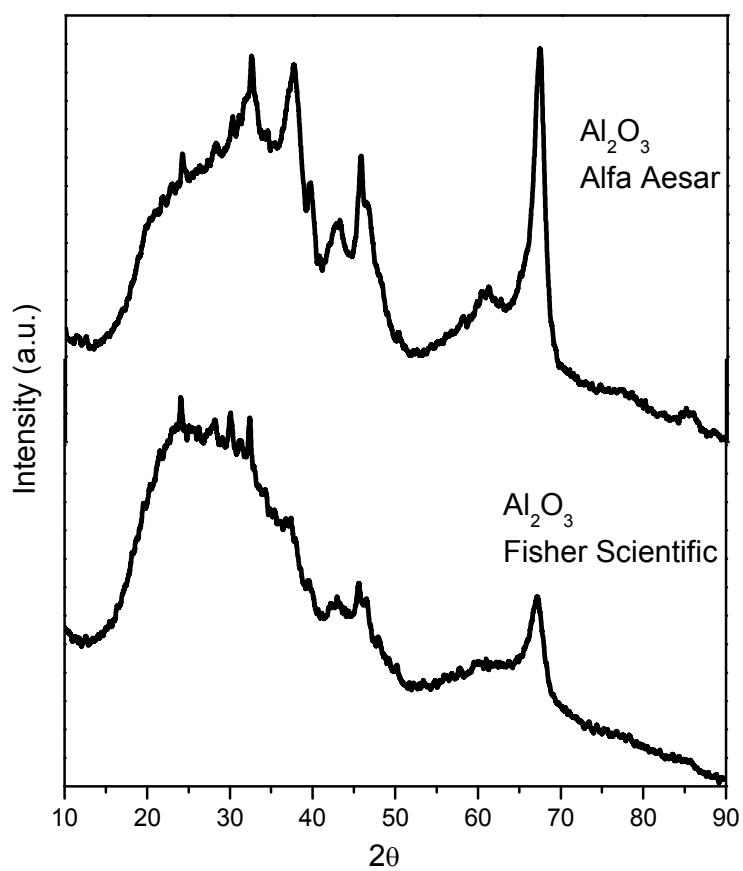

Figure 1S: Powder X-ray diffraction (XRD) patterns of the  $\text{Al}_2\text{O}_3$  samples used in this study. XRD were collected by using a continuous scan mode from  $2\theta = 10^\circ$  to  $90^\circ$  with a step size 0.01.

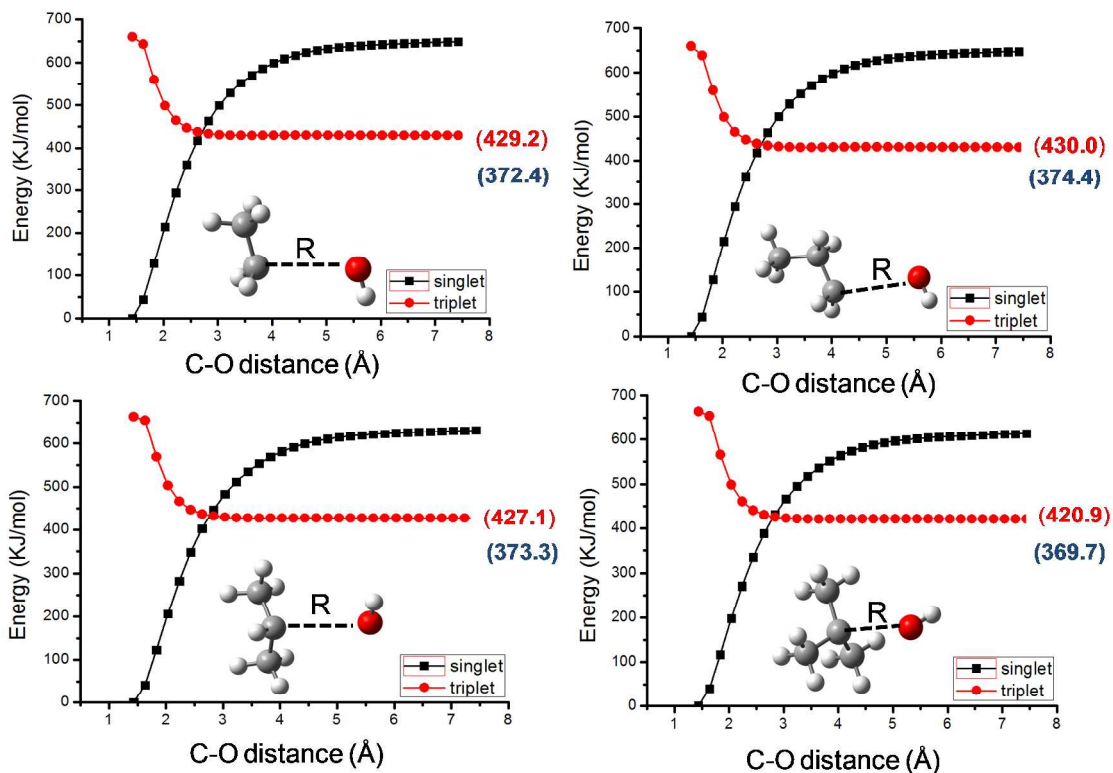

Figure 2S: Potential energy scan of the C-OH bond breaking under singlet and triplet spin states (electronic energies). All the curves are referenced to the corresponding alcohol ground state ( $E=0$ ). The values in blue (appear also in Table 3 of the manuscript) are the enthalpies when the dissociated compounds are separated to infinity and fully relaxed ( $C_nH_{2n+1} + OH$ ).

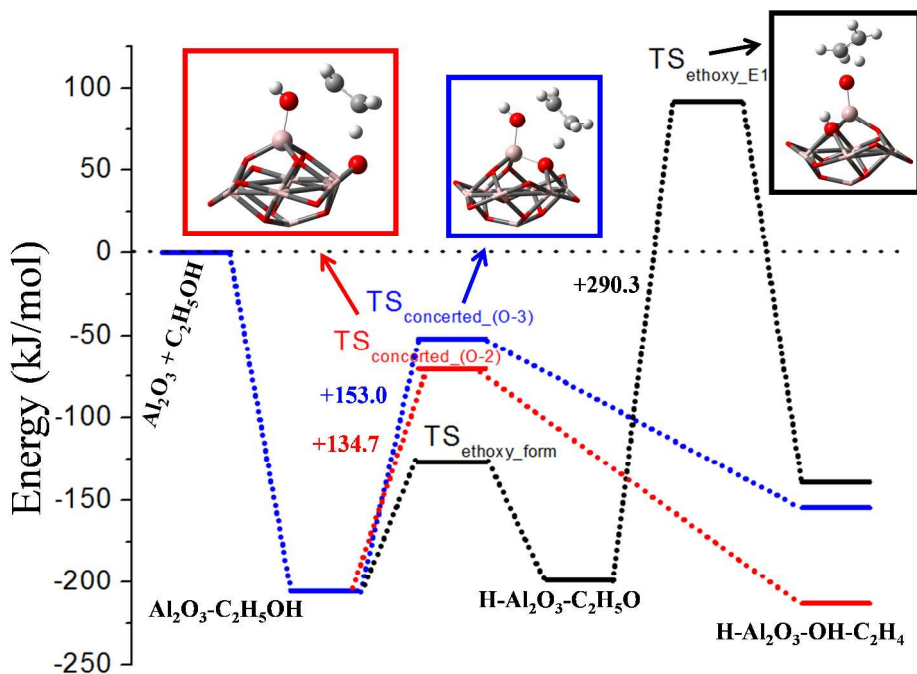

**Figure 3S.** DFT calculated paths considered for the dehydration of ethanol to ethylene on  $Al_8O_{12}$ . The E1 type mechanism through the alkoxy-intermediate exhibits a high barrier (290.3 kJ/mol) compared to the concerted dehydration mechanism (134.7 and 153.0 kJ/mol involving a 2- and 3-coordinated O atom, respectively).

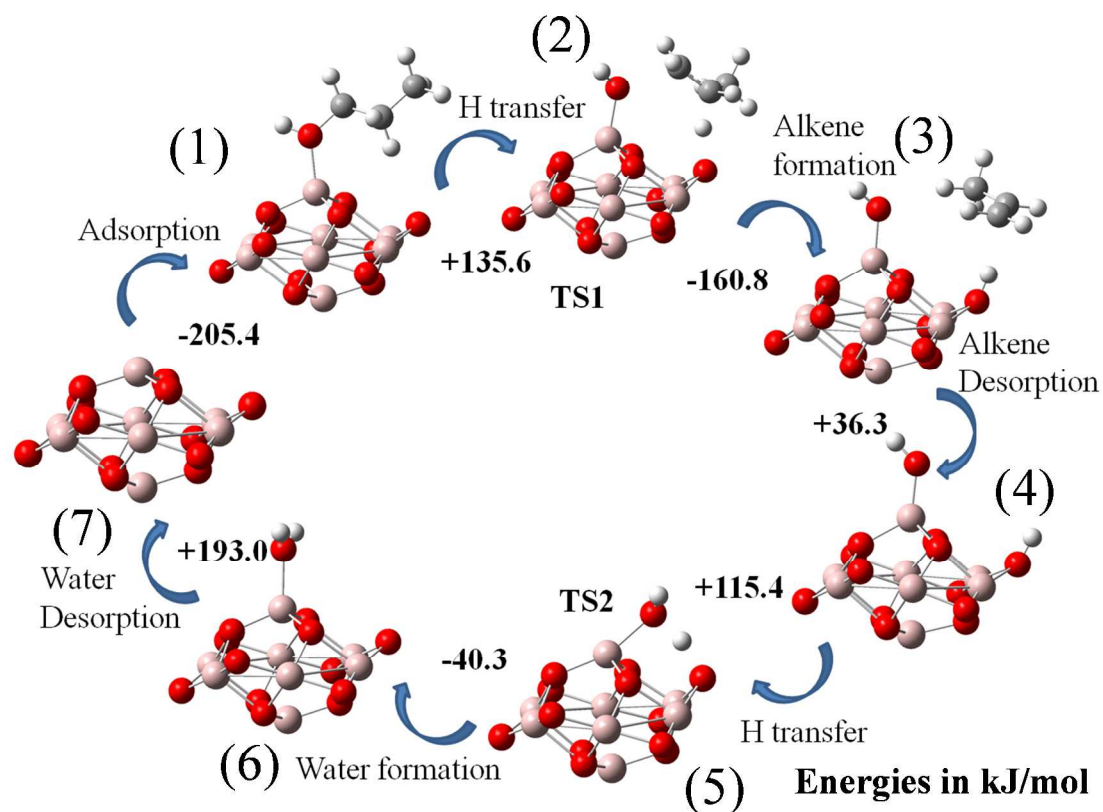

**Figure 4S.** Scheme of 1-propanol dehydration reaction involving a tri-coordinated Al Lewis-acid site and a two-coordinated O of  $\gamma$ - $\text{Al}_2\text{O}_3$  as presented in Figure 5 (b) of the manuscript. The steps are: 1) adsorption, 2) dehydration TS, 3) Alkene formation, 4) Alkene desorption, 5) water formation TS, 6) water formation, and 7) water desorption.

| Alcohol             | Distance (Angstroms) |                    |                    | Total charge on C <sub>n</sub> H <sub>2n+1</sub> and (OH) group ( e <sup>-</sup>  ) |                     |                     |
|---------------------|----------------------|--------------------|--------------------|-------------------------------------------------------------------------------------|---------------------|---------------------|
|                     | Non-adsorbed         | Adsorbed           | Transition State   | Non-adsorbed                                                                        | adsorbed            | Transition State    |
| Ethanol             | R1=1.43<br>R2=1.09   | R1=1.49<br>R2=1.09 | R1=2.12<br>R2=1.28 | +0.29<br>(OH:-0.29)                                                                 | +0.44<br>(OH:-0.29) | +0.57<br>(OH:-0.56) |
| 1-Propanol          | R1=1.42<br>R2=1.09   | R1=1.49<br>R2=1.09 | R1=2.20<br>R2=1.26 | +0.29<br>(OH:-0.29)                                                                 | +0.40<br>(OH:-0.21) | +0.63<br>(OH:-0.57) |
| 2-Propanol          | R1=1.43<br>R2=1.09   | R1=1.50<br>R2=1.09 | R1=2.39<br>R2=1.21 | +0.30<br>(OH:-0.30)                                                                 | +0.45<br>(OH:-0.31) | +0.71<br>(OH:-0.61) |
| 2-methyl-2-Propanol | R1=1.44<br>R2=1.09   | R1=1.52<br>R2=1.09 | R1=2.64<br>R2=1.16 | +0.31<br>(OH:-0.31)                                                                 | +0.50<br>(OH:-0.33) | +0.80<br>(OH:-0.65) |

**Table 1S.** Structural and natural bond orbital (NBO) charge analysis of the alcohols in the gas-phase (non-adsorbed), adsorbed on the Al<sub>8</sub>O<sub>12</sub> cluster and at the transition state. R1 and R2 are the distances of C-OH and C-H, respectively, as they appear in Figure 5 (c) of the manuscript. R1 of all the alcohols is profoundly increased whereas R2 is much less at the transition state. This C-OH elongation induces a charge separation, giving carbenium ion characteristics to the transition state.

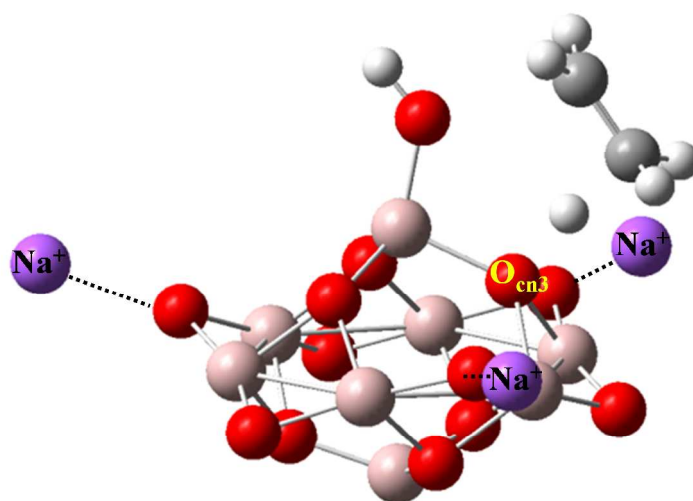

| Base-site of $\text{Al}_8\text{O}_{12}$                    | Ea (kJ/mol) |
|------------------------------------------------------------|-------------|
| $\text{O}_{\text{CN}=3}$ cluster doped with $3\text{Na}^+$ | 166.2       |
| $\text{O}_{\text{CN}=3}$ undoped cluster                   | 153.0       |
| $\text{O}_{\text{CN}=2}$ undoped cluster                   | 134.2       |

**Figure 5S.** Transition state of ethanol dehydration involving  $\text{O}_{\text{cn}3}$ , when the  $\text{O}_{\text{cn}2}$  sites of the cluster interact with  $\text{Na}^+$ . As it can be seen from the inset table, the alcohol dehydration barriers shift to higher energies with decreasing strength of the basic-center ( $\text{O}_{\text{cn}3}$  vs.  $\text{O}_{\text{cn}2}$ ) and increasing  $\text{Na}^+$  content ( $\text{O}_{\text{cn}3}$  on undoped vs.  $\text{Na}^+$  doped  $\text{Al}_8\text{O}_{12}$ ).

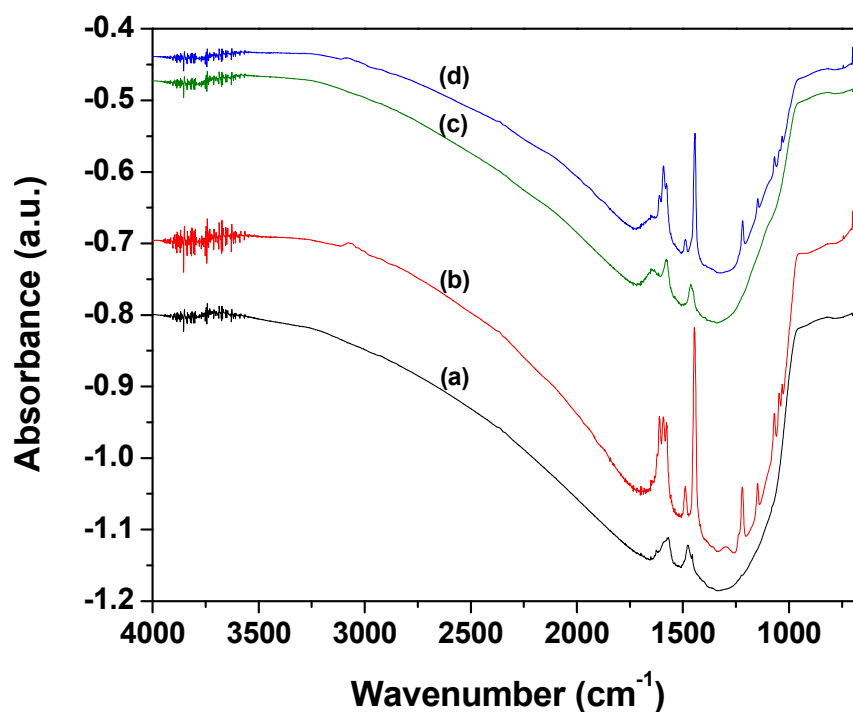

**Figure 6S.** FTIR spectra recorded at 30°C. All samples were treated in flowing dry air to 500°C in flowing dry air prior to degassing under vacuum ( $4.0 \times 10^{-2}$  torr) for 1h.

- (a)  $\gamma$ -Al<sub>2</sub>O<sub>3</sub>
- (b) Pyridine (3 torr) was dosed at 30°C for 0.5h and the sample was subsequently degassed to  $4.0 \times 10^{-2}$  torr to remove physisorbed pyridine.
- (c) The sample was exposed to water vapor (8.0 torr) at 300°C for 0.3h.
- (d) Pyridine (2 torr) was dosed to the sample in (c) at 30°C for 0.5h, the sample was subsequently degassed to  $4.0 \times 10^{-2}$  torr to remove physisorbed pyridine.
